# Supplementary material
Source: PubMed Central journal article supplement (PMC4640209)
Supplement: NIHMS733373-supplement-Suppl_Table_A.pdf [file NIHMS733373-supplement-Suppl_Table_A.pdf]

**Supplementary Table A: Subjects Reporting Adverse Effects in the Naltrexone and Placebo Groups**

|                                          | 1 Week After Quit Date |                       | 4 Weeks After Quit Date |                       |
|------------------------------------------|------------------------|-----------------------|-------------------------|-----------------------|
|                                          | Placebo<br>(n=133)     | Naltrexone<br>(n=136) | Placebo<br>(n=116)      | Naltrexone<br>(n=131) |
| <b>Opioid Antagonist Adverse Effects</b> |                        |                       |                         |                       |
| Nausea                                   | 23 (17)                | 48 (35) **            | 11 (9)                  | 18 (14)               |
| Vomiting                                 | 5 (4)                  | 9 (7)                 | 0 (0)                   | 2 (2)                 |
| Headache                                 | 54 (41)                | 63 (46)               | 44 (38)                 | 42 (32)               |
| Lightheaded or dizzy                     | 34 (26)                | 53 (39) *             | 21 (18)                 | 31 (24)               |
| Flushed or warm                          | 31 (23)                | 43 (32)               | 22 (19)                 | 31 (24)               |
| Tiredness                                | 83 (62)                | 95 (70)               | 60 (52)                 | 68 (52)               |
| Agitation or anxiety                     | 76 (57)                | 70 (51)               | 48 (41)                 | 51 (39)               |
| Increased Sexual Desire                  | 34 (26)                | 22 (16)               | 30 (26)                 | 39 (30)               |
| Increased Erections <sup>a</sup>         | 23 (36)                | 14 (22)               | 14 (26)                 | 24 (39)               |
| <b>Nicotine Patch Adverse Effects</b>    |                        |                       |                         |                       |
| Skin Itching, redness, or burning        | 50 (38)                | 44 (32)               | 31 (27)                 | 32 (24)               |
| Welts or hives                           | 4 (3)                  | 4 (3)                 | 6 (5)                   | 10 (8)                |
| Insomnia                                 | 34 (26)                | 39 (29)               | 26 (22)                 | 29 (22)               |
| Constipation                             | 38 (39)                | 44 (32)               | 21 (18)                 | 35 (27)               |
| Diarrhea (loose stool)                   | 14 (11)                | 13 (11)               | 16 (14)                 | 15 (11)               |
| Joint or muscle pain <sup>b</sup>        | 41 (31)                | 37 (27)               | 34 (29)                 | 35 (27)               |

Note: Data are frequencies (percentage) that were rated either 1 (mild) or 2 (severe) on the side-effects scale. Analyses conducted with chi-square tests. \*\* $p < .01$ ; \* $p < .05$ ; <sup>a</sup>Data for penile erections include men only (i.e., at 1 week,  $n=64$  in both naltrexone and placebo groups; at 4 weeks,  $n=62$  naltrexone,  $n=54$  placebo). <sup>b</sup> joint or muscle may also be considered an opioid antagonist side effect.
