# Supplementary material
Source: PubMed Central journal article supplement (PMC4640209)

# Supplementary Figure A

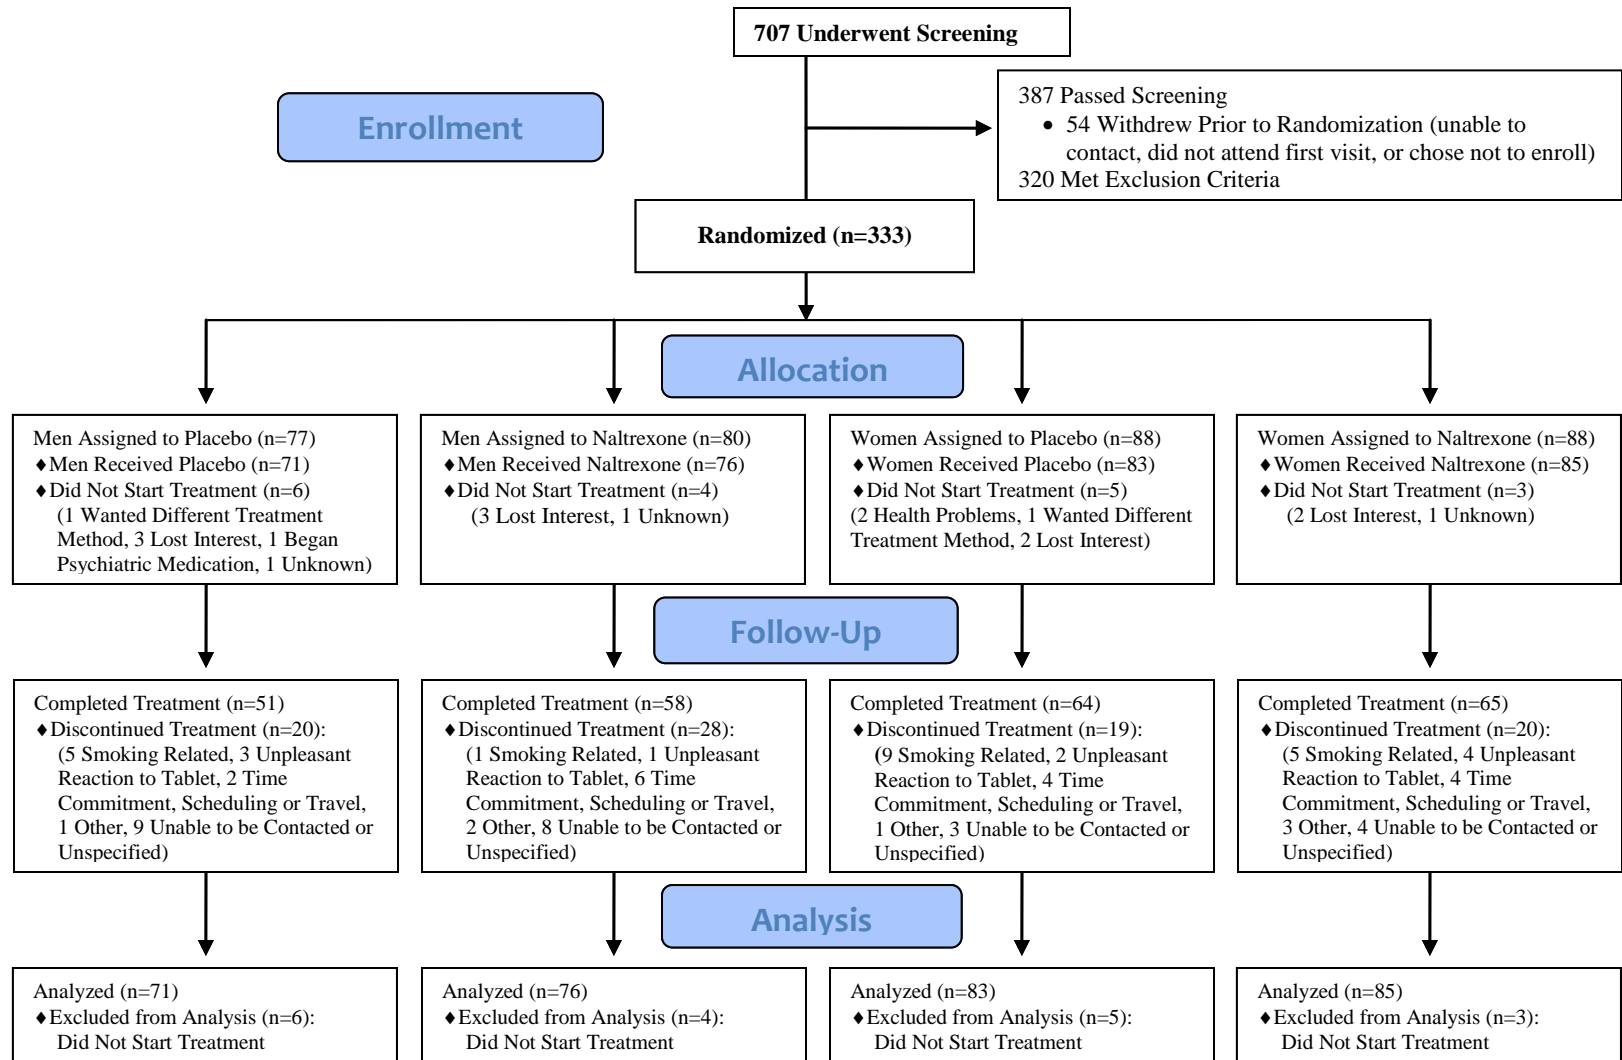

Supplement: NIHMS733373-supplement-Suppl_FIg_A.pdf [file NIHMS733373-supplement-Suppl_FIg_A.pdf]
